# Supplementary material for: Microstructural differences in the osteochondral unit of terrestrial and aquatic mammals
Source: eLife. 2023 Nov 27;12:e80936. doi: 10.7554/eLife.80936 (PMC10781421; doi:10.7554/eLife.80936)
Supplement: Figure 1—source data 1. [file elife-80936-fig1-data1.xlsx]

## Sheet: Thickness
Aquatic mammals	ID	Species	Average (mm)	Weight (kg)	Average (mm)	Weight (kg)	% Deep	% Middle	% Superficial
	OR69_IM36	Minke Whale 1	5.25118	4600	5.04588	5100	48.0639	36.8047	15.1314
	OR69_IM37	Minke Whale 2	4.84058	5600
	OR69-IM11	Seal 2	0.879595	60	1.76579	67.5	53.8037	33.9848	12.2116
	OR69-IM7	Seal 1	2.65198	75
	OR69-IM4	Porpoise 1	1.8005	50	1.11178	52.3778	56.5679	28.6508	14.7813
	OR69-IM10	Porpoise 2	1.18327	40
	OR69-IM12	Porpoise 3	0.759775	45
	OR69-IM13	Porpoise 4	0.819861	40.4
	OR69-IM15	Porpoise 5	1.28582	66
	OR69-IM16	Porpoise 6	1.01084	42
	OR69-IM21	Porpoise 7	0.97719	70
	OR69-IM22b	Porpoise 8	0.88578	68
	OR69-IM23a	Porpoise 9	1.28299	50
	OR69-IM25	Fin whale	7.53078	48000	7.53078	48000	45.2364	42.0968	12.6668
	OR69-IM24	Sperm whale	7.66588	46000	6.51122	46000	23.0332	71.1273	5.83946
	OR69-IM26	Spermwhale 1	5.76865	46000
	OR69-IM28	Spermwhale 3	6.09912	46000
	OR-69IM	Striped Dolphin	1.37493	180	1.37493	180	55.1954	28.8571	15.9476
Terrestrial mammals	ID	Species	Average (mm)	Weight (kg)	Average (mm)	Weight (kg)	% Deep	% Middle	% Superficial
	OR69-IM1	Horse	1.30976	550	1.38051	550	68.5851	21.9755	9.43942
	OR69-IM2	Horse	1.45127	550
	OR69-IM3	Giraffe	1.74906	1122	1.84519	1100	59.5619	30.9278	9.51035
	OR69-IM8	Giraffe	1.94131	1078
	OR69-IM5	Tufted deer	1.30218	23	1.30218	23	42.328	48.1125	9.55946
	OR69-IM6	Badger	0.837019	13.2	0.837019	13.2	70.1403	21.0998	8.75982
	OR69-IM32	Shetland pony	0.993376	180	1.17181	175	50.6158	39.6721	9.71207
	OR69-IM30	Shetland pony	1.35025	170
	OR69-IM14b	Cheetah	0.477214	25.5	0.477214	25.5	80.905	11.8438	7.25123
	OR69-IM17	Onager	0.887066	203	0.887066	203	69.9871	25.3678	4.64519
	OR69-IM20	White rhinoceros	2.15868	1475	2.15868	1475	92.0984	5.50097	2.40058
	OR69-IM31	Rat 57	0.213203	0.256	0.208895	0.26545	40.9668	24.3475	34.6857
	OR69-IM33	Rat 58	0.181644	0.2637
	OR69-IM34	Rat 60	0.234259	0.2779
	OR69-IM35	Rat 59	0.206475	0.2642
	OR69-IM	Indian Chrested Porcupine	0.495127	24.5	0.495127	24.5	75.2525	12.5882	12.1592
